# Supplementary material for: Genome-Wide Comparative in silico Analysis of Calcium Transporters of Rice and Sorghum
Source: PubMed Central journal article supplement — Genomics Proteomics Bioinformatics. 2011 Dec 23;9(4-5):138–50. doi: 10.1016/S1672-0229(11)60017-X (PMC5054455; doi:10.1016/s1672-0229(11)60017-x), 2011-12-23
Supplement: mmc1.pdf [file mmc1.pdf]

## Supplementary Material

Goel, A., *et al.* 2011. Genome-wide comparative *in silico* analysis of calcium transporters of rice and sorghum. *Genomics Proteomics Bioinformatics* 9(4-5): 138-150.

DOI: [10.1016/S1672-0229\(11\)60017-X](https://doi.org/10.1016/S1672-0229(11)60017-X)

Figure S1

**Figure S1** Multiple sequence alignment of calcium transporter proteins in rice and sorghum. ClustalW alignment of amino acid sequences of calcium channel (A), ATPase (B) and exchanger (C) from rice and sorghum was indicated. The conserved signature sequences of the calcium ATPase are boxed.

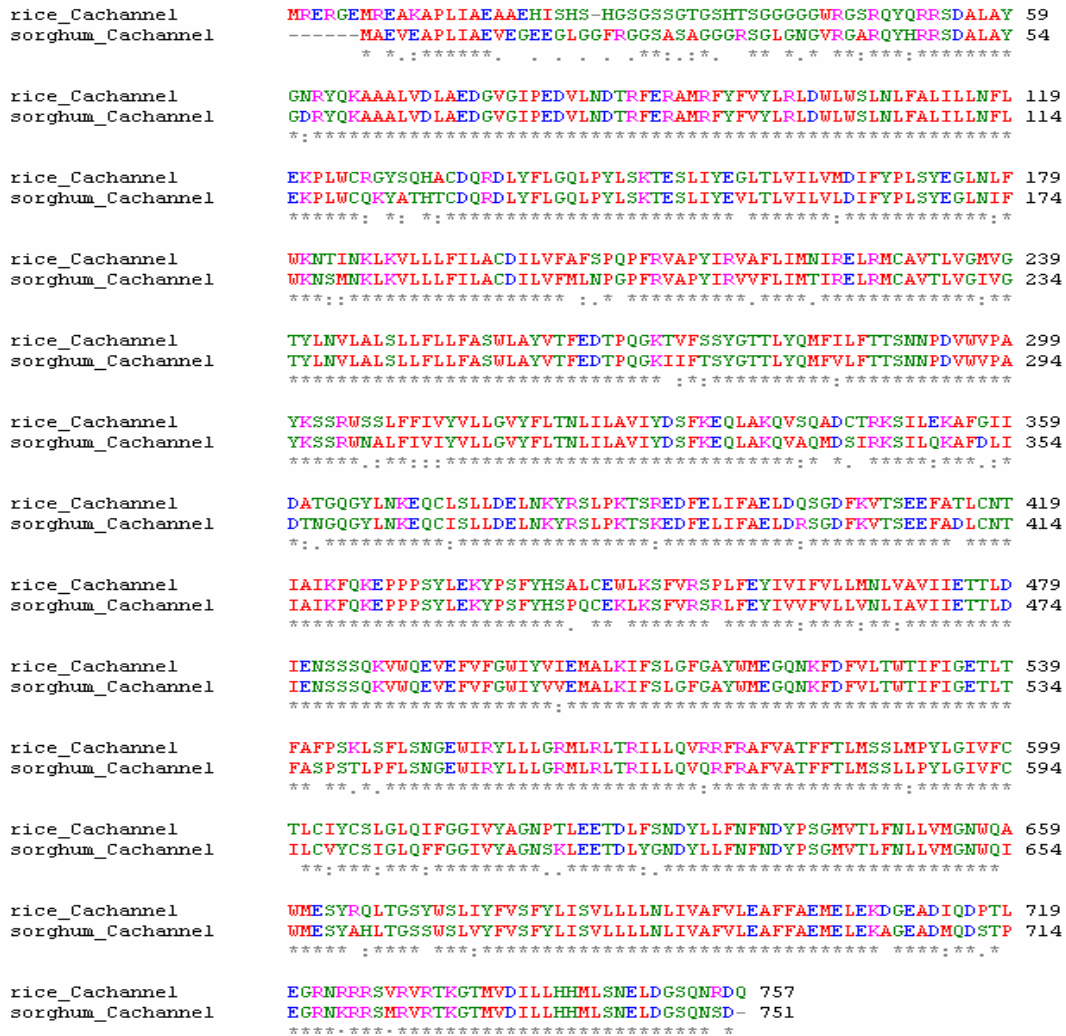

A

|             |            |            |            |            |           |             |            |
|-------------|------------|------------|------------|------------|-----------|-------------|------------|
| Os01g71240  | LPLAVTSLA  | FAMKMLQER  | ALVRHLSACE | TMGSASCICT | DRTGLTTNH | VVVERKIASG  | AAQTMNSARG |
| Os02g08018  |            |            |            |            |           |             |            |
| Os03g17310  | LPAVITTCIA | LGRKMAQKN  | ALVRKLPSE  | TLGCTTVICS | DRTGLTTNQ | SAVKLVAIG   | RWPD--LRS  |
| Os03g42020  | LPLAVTSLA  | FAMKMMNDK  | ALVRQLAACE | TMGSATVICS | DRTGLTTNR | STVVKACICG  | NTIQVNPQT  |
| Os03g52090  | LPAVITTCIA | LGRKMARLN  | AIYRSLPSE  | TLGCTTVICS | DRTGLTTNM | ISVSRKCVFR  | SVHRPITDE  |
| Os03g10640  | LPLAVTSLA  | FAMKMMNDK  | ALVRHLAACE | TMGSATTICS | DRTGLTTNH | STVVKACICG  | KIKDVESASD |
| Os04g51610  | LPLAVTLTA  | FSMKMMNDK  | ALVRHLSACE | TMGSATTICS | DRTGLTLNQ | STVVEAYFGG  | KKMDPPDN-- |
| Os05g41580  | LPLAVTSLA  | FAMKMLHDK  | ALVRHLAACE | TMGSASCICT | DRTGLTTNH | IVDKVWIGD   | VK--FVGDKI |
| Os05g02940  |            |            |            |            |           |             |            |
| Os08g40530  |            |            |            | TMGSATTICS | DRTGLTLNK | STVQAYFGG   | TMLDPCDD-- |
| Os10g28240  | LPLAVTLTA  | FSMKRMVREN | ALVRHLSACE | TMGSVTAICT | DRTGLTLNQ | KVTEFWVG--  | --ADRPR--  |
| Os11g04460  | LPLAVTSLA  | FAMKMLNDK  | ALVRHLSACE | TMGSAGTICT | DRTGLTTNY | VVDRKIWISE  | NSKSVTSNTI |
| Os12g04220  | LPLAVTSLA  | FAMKMLNDK  | ALVRHLSACE | TMGSAGTICT | DRTGLTTNH | VVDRKIWISE  | NSKSVTSNTI |
| Os12g39660  | LPLAVTSLA  | FAMKMMNDK  | ALVRHLAACE | TMGSATTICS | DRTGLTTNH | STVVKACICG  | NIKEVNPKN  |
| Sb01g038990 | LPAVITTCIA | LGRKMAQKN  | ALVRKLPSE  | TLGCTTVICS | DRTGLTTNQ | SAVKLVAIG   | RWPD--LRS  |
| Sb01g021870 | LPLAVTLTA  | FSMKRMVKEH | ALVRTLSACE | TMGSVTAICT | DRTGLTLNQ | KVTEFWVG--  | --DDRPK--  |
| Sb01g043620 | LPLAVTSLA  | FAMKMMNDK  | ALVRHLAACE | TMGSATVICS | DRTGLTTNH | STVVKACICG  | KIKEVDGSD  |
| Sb01g014620 | LPLAVTSLA  | FAMKMMNDK  | ALVRQLAACE | TMGSATVICS | DRTGLTTNR | STVVKACICG  | NIMEVTPPV  |
| Sb02g028935 | LPLAVTLTA  | YSMKMMNDK  | ALVRLSSCE  | TMGSATTICS | DRTGLTMNK | STVVEAYLGG  | KEMDPYDN-- |
| Sb03g045370 | LPLAVTSLA  | FAMKMLQER  | ALVRHLSACE | TMGSASCICT | DRTGLTTNH | VVVERKIASG  | AAQTVSTARG |
| Sb04g005130 | LPLAVTLTA  | YSMKMMADK  | ALVRHLSACE | TMGSATTICS | DRTGLTLNQ | STVQOSIVGE  | VKLOPPAN-- |
| Sb05g002380 | LPLAVTSLA  | FAMKQLMNDK | ALVRHLSACE | TMGSAGTICT | DRTGLTTNH | VVVERKIWISE | NSKSVTSNNS |
| Sb06g027770 | LPLAVTLTA  | FSMKMMNDK  | ALVRHLSACE | TMGSATTICS | DRTGLTLNQ | STVVEAYFGG  | KKMDPPDN-- |
| Sb07g028160 | LPLAVTSLA  | FAMKMMNDK  | ALVRHLAACE | TMGSATTICS | DRTGLTTNH | STVVKACICG  | KIKDVSSAE  |
| Sb07g026810 | LPLAVTLTA  | YSMKMMNDK  | ALVRLSSCE  | TMGSATTICS | DRTGLTLNK | STVVEAYFAG  | TKLDPCDD-- |
| Sb08g001260 | LPLAVTSLA  | FAMKMLNDK  | ALVRHLSACE | TMGSAGTICT | DRTGLTTNH | VVDRKIWISE  | NSKSVTSNNS |
| Sb09g024300 | LPLAVTSLA  | FAMKMLNDK  | ALVRHLAACE | TMGSASCICT | DRTGLTTNH | IVDKVWIGD   | NSKSVNDTN  |
| Sb09g001850 | LPAVITTCIA | LGRKMAAKN  | ALVRKLPSE  | TLGCTTVICS | DRTGLTTNK | SAVKLVAIG   | DSSQE--VRS |
| Sb06g029175 |            |            |            |            |           |             |            |

**B**

|             |                                                                                                                              |
|-------------|------------------------------------------------------------------------------------------------------------------------------|
| Os01g11414  | CIITKAVGLLLGSAIAAAFADPLVDVHNFNASHISPSFTISFIALPHATNSSEAVSAIIFASRKKLRSSLTSEYVGGVMMNNTLCLGFLIATIKR--NLTWDFSEVLLILLVCMIGLFTS     |
| Sb04g008850 | TSEKATISLLLLGTAMAAAFADPLVDVHGFNASTISPSFTISFIAMPLATNSSEAVSAIIFASRKKQRSSLTSEYVGGVMMNNTLCLAVFLGIIVR--GLTWDFSEVLLIIFVCMIGLFTS    |
| Os05g51610  | GFSSAMTWLWMLTLLALLSEYVSTTEAESWELSWSPISITLLPIVGNAAEHAGAVIFAKNM---DITLGVLSGSAIQISMVFPVSWIIVAMTGMPLDNLNLETGSLRLAIVLTAFTL        |
| Sb09g030750 | GFSSAMTWLWMLTLLAVLSEYVSTTE---DITLGVLSGSAIQISMVFGW---                                                                         |
| Os01g37690  | GFASALFWLADTAVISVLSSEYVSTTEPESQWGLSWSPISITLLPIVGNAAEHAGAIIFAKNKL---DITLGVLSGSAIQISMFPVPLSWLWAMTGMPLDNLNLETGSLRMAVILVTAFTL    |
| Os02g21009  | GFASAMWVLLGMAVITAMLSSEYVSTTEPESMGLVPRFISITLLPIVGNAAEHAGAIIFAPNKI---DITLGVLSGSAIQISMLVFPVILWISWNNAIPLMDLNLNLETGSLAMAVITVTAFTL |
| Sb04g010130 | GSASVIVWLGITVVIIVLNSVYVSTTEPESDALGIVPRFISITLLPIVGNAAEHAGAIIFAPNKI---DITLGVLSGSAIQILLVFPVILWISWNNIPLMDLNLNLETGSLVMTVITVTAFTL  |
| Os02g04630  | -----ASKAWNIWAFISVWLLPVVGNISAGHANAVMFAVKDKL---DITLGVLSGSAIQISMFGIIFPCVWMMGKPMQMDNLNLETGSLVMTVITVVAELL                        |
| Sb04g003135 | ISKWEAIWLAITFAWISVFSDFVEATEGASAKWIKWAFISVWLLPIVGNAAEHASAIMFAMDKL---DITLGVLSGSAIQISMFPVFPVWMMGKPMQMDNLNLETGSLVMTVITVVAELL     |
| Os03g27960  | TQCEAICWLFILWISLISEYLDATQASSENINFPWAFISVILLPIVGNAAEHASAIMFAMDKL---DITLGVLSGSAIQISMFPVFPVWMMGKPMQMDNLNLETGSLVMTVITVVAELL      |
| Sb01g033220 | TQCEAICWLFILWISLISEYLDATQASSENINFPWAFISVILLPIVGNAAEHASAIMFAMDKL---DITLGVLSGSAIQISMFPVFPVWMMGKPMQMDNLNLETGSLVMTVITVVAELL      |
| Os04g55940  | GMWESTAWLMLWISLISEYLDATQASSENINFPWAFISVILLPIVGNAAEHASAIMFAMDKL---DITLGVLSGSAIQISMFPVFPVWMMGKPMQMDNLNLETGSLVMTVITVVAELL       |
| Sb06g031080 | GMWESTAWLMLWISLISEYLDATQASSENINFPWAFISVILLPIVGNAAEHASAIMFAMDKL---DITLGVLSGSAIQISMFPVFPVWMMGKPMQMDNLNLETGSLVMTVITVVAELL       |
| Os02g43110  | -EIAHGWIAPICSLIFISGLAYGVTKITDQISCVTGVSYVYIAPTALAAAGTSPDVLVASKIAAERQIT--ADSATNTTCR-----YIS-AHLLSN-----                        |
| Os11g43860  | -EIAHGWIAPICSLIFISGLAYGVTKITDQISCVTGVSYVYIAPTALAAAGTSPDVLVASKIAAERQIT--ADSATNTTCRNVNIYVGIWVPLVDMYNYVYQKPLIDNAAGLSFSLVFPAL    |
| Os03g45370  | RRVPLAAGFLMSVLWAYTLARELVALLVSIYVGVRSVWLVGTVLWAGDSLGLVSNVAMAHGGAG--GAQTAVSFCYAGPEFNWVGLGLSUTLAAGCAQHPAPPVFPADAAWVAVGFLGAGL    |
| Sb01g012910 | RRVPLAAGFLMSVLWAYTLARELVALLVSIYVGVRSVWLVGTVLWAGDSLGLVSNVAMAHGGAG--GAQTAVSFCYAGPEFNWVGLGLSUTLAAGCAQHPAPPVFPADAAWVAVGFLGAGL    |
| Os12g42910  | RLPWLAGGFLMSVLWYVLAARELVALLVSIYVGVRSVWLVGTVLWAGDSLGLVADVALAARRDGGAGQAVAGCYAAPAFENWVGLGLSUTLAAGARPEAVVGGAVVAVGFLAAGL          |
| Sb08g022240 | RLPWLAGGFLMSVLWYVLAARELVALLVSIYVGVRSVWLVGTVLWAGDSLGLVADVALAARRDGGAGQAVAGCYAAPAFENWVGLGLSUTLAAGARPEAVVGGAVVAVGFLAAGL          |
| Os03g08230  | LLFPWVGGFVMSIITWFYIIANELVALLVAFGVILGINSILGTVLWAGNSMGLDLSNVALAMNGGDG---VQIAMSFCYAGPEFNWVGLGLSMLLGAWSTANSVLPODSSLIYTMSEFLVAGL  |
| Sb03g008600 | LLFPWVGGFVMSIITWFYIIANELVALLVAFGVILGINSILGTVLWAGNSMGLDLSNVALAMNGGDG---VQIAMSFCYAGPEFNWVGLGLSMLLGAWSTANSVLPODSSLIYTMSEFLVAGL  |
| Os10g30070  | LAAPLAAAGFVMSVAVAYAVATELLALVSAHVMGSDAALGTVLWAGNSLGLVLANVAVASRGGGGG--GAQTAVAGCYGGFVFDVWVGLGWSMLLSSWASHRFPVAMPAPAGPQLTGFAPAAAI |
| Os11g01580  |                                                                                                                              |
| Sb01g021270 | LLGAWLGGFVMSVAVAYAVIANEVLISLVSAGTILSNDAALGTVLWAGNSLGLVLANVAVASRGGGA---QVAVSFCYGGFVFNWVGLGLSMLLSCWSGHPFPVETPREPGLMRTLAFAVAGL  |
| Sb03g013753 |                                                                                                                              |
| Sb04g011451 |                                                                                                                              |
| Os11g05070  | -----MDIDAEKAVSITETEVNGLGRVMDLPTVEDRKQ-----QHTLCTMPSKLLQSNSEF                                                                |
| Os03g01330  | -----TEEDAGVAVGEVHEGGPLADLVEVEVDAGGGG-----CELVEEDLDAEVEGVEQGEVGEVVEGVELEEEV                                                  |

**C**
